# Supplementary material
Source: PubMed Central journal article supplement (PMC5711402)
Supplement: AnnalsATS.201702-148SR_altman_data_supplement.pdf [file AnnalsATS.201702-148SR_altman_data_supplement.pdf]

## Online Data Supplement

### Sleep Disturbance after Hospitalization and Critical Illness: A Systematic Review

Marcus T. Altman, Melissa P. Knauert, MD, PhD, Margaret A. Pisani, MD, MPH

#### Systematic Review Search Strategy

1) Pubmed, Jan 4<sup>th</sup> 2017

- a. ("sleep disturbance" OR "sleep quality" OR sleep wake disorders[MeSH Terms] OR dyssomnias[MeSH Terms] OR sleep disorders, circadian rhythm[MeSH Terms] OR sleep deprivation[MeSH Terms] OR chronobiology disorders[MeSH Terms]) AND (critical illness[MeSH Terms] OR intensive care units[MeSH Terms] OR critically ill[MeSH Terms] OR patient discharge[MeSH Terms] OR critical care[MeSH Terms] OR "intensive care unit" OR "ICU" OR "critical illness" OR "critically ill" OR "post-ICU" OR "hospital discharge" OR "post-hospital")

2) MEDLINE, Jan 4<sup>th</sup> 2017

- a. (sleep disturbance.af. or sleep quality.af. or sleep wake disorders.sh. or dyssomnias.sh. or sleep disorders, circadian rhythm.sh. or sleep deprivation.sh. or chronobiology disorders.sh.) and (critical illness.sh. or intensive care units.sh. or critically ill.sh. or patient discharge.sh. or critical care.sh. or intensive care unit.af. or ICU.af. or critical illness.af. or

critically ill.af. or post-ICU.af. or hospital discharge.af. or post-hospital.af.)

3) EMBASE, Jan 4<sup>th</sup> 2017

- a. (sleep disturbance.af. or sleep quality.af. or sleep wake disorders.sh. or dyssomnias.sh. or sleep disorders, circadian rhythm.sh. or sleep deprivation.sh. or chronobiology disorders.sh.) and ((critical illness or intensive care units or critically ill or patient discharge or critical care).sh. or intensive care unit.af. or ICU.af. or critical illness.af. or critically ill.af. or post-ICU.af. or hospital discharge.af. or post-hospital.af.)

4) EMBASE, Feb 1<sup>st</sup>, 2017

1. sleep disturbance.mp.
2. sleep quality/ or sleep quality.mp.
3. sleep disorder/ or circadian rhythm sleep disorder/ or insomnia/ or primary insomnia/
4. sleep deprivation/
5. 1 or 2 or 3 or 4
6. critical illness.mp. or critical illness/
7. intensive care/ or intensive care unit/ or intensive care unit\*.mp. or ICU.mp.
8. critically ill.mp. or critically ill patient/
9. hospital discharge/ or hospital discharge.mp.
10. post-ICU.mp.

11. post-hospital.mp.

12. 6 or 7 or 8 or 9 or 10 or 11

13. 5 and 12

14. limit 13 to [conference abstract or editorial or letter or note]

15. 13 not 14

16. 15

17. limit 16 to [human and English language]
